# Supplementary material for: Eco-friendly colorful particle boards based on metal–ligand coordination
Source: Royal Society of Chemistry journal article supplement (doi:10.1039/d5mh00281h), 2025-01-01
Supplement: d5mh00281h2.pdf [file d5mh00281h2.pdf]

Electronic Supplementary Information

**Eco-friendly colorful particleboards based on metal-ligand  
coordination**

Yu Kang,<sup>ab</sup> Xuetao Xu,<sup>a</sup> Jiankun Lai,<sup>ab</sup> Yuepeng Li,<sup>ab</sup> Wei Li,<sup>ab</sup> Yanqiang Wei,<sup>a</sup>  
Feilong Zhang<sup>a</sup> and Shutao Wang<sup>\*ab</sup>

<sup>a</sup>CAS Key Laboratory of Bio-inspired Materials and Interfacial Science, Technical Institute of Physics and Chemistry, Chinese Academy of Sciences, Beijing 100190, P. R. China

<sup>b</sup> School of Future Technology, University of Chinese Academy of Sciences, Beijing 100049, P. R. China

**\*Corresponding authors.** E-mail: stwang@mail.ipc.ac.cn

## Contents:

### 1. Supplementary Figures

|                                                                                                                                                                                                                  |    |
|------------------------------------------------------------------------------------------------------------------------------------------------------------------------------------------------------------------|----|
| <b>Fig. S1</b> .....                                                                                                                                                                                             | 3  |
| <b>Fig. S2</b> .....                                                                                                                                                                                             | 4  |
| <b>Fig. S3</b> UV–visible (UV–Vis) spectra of the as-prepared colorful particleboards in Figure 1. ....                                                                                                          | 5  |
| <b>Fig. S4</b> X-ray photoelectron spectroscopy (XPS) 2 <i>p</i> spectra of the as-prepared colorful particleboards in Figure 2a. ....                                                                           | 6  |
| <b>Fig. S5</b> UV–vis spectra of the as-prepared particleboards, colored using CoCl <sub>2</sub> with L1 in tetra-coordinated configuration and CoSO <sub>4</sub> with L1 in six-coordinated configuration. .... | 7  |
| <b>Fig. S6</b> X-ray absorption analysis of coordination structures in as-prepared colorful particleboards. ....                                                                                                 | 8  |
| <b>Fig. S7</b> UV–vis spectra and peaks value of the as-prepared particleboards colored by Cu <sup>2+</sup> and citric acid with different pH values of the adhesive aqueous solution. ....                      | 9  |
| <b>Fig. S8</b> Regulation of the mechanical properties of the as-prepared particleboards. ..                                                                                                                     | 10 |
| <b>Fig. S9</b> Microstructure of the as-prepared colorful particleboards. ....                                                                                                                                   | 11 |
| <b>Fig. S10</b> Heating-induced softening process of the adhesive. ....                                                                                                                                          | 12 |

### 2. Supplementary Tables

|                                                                                |    |
|--------------------------------------------------------------------------------|----|
| <b>Table S1</b> EXAFS coordinate environment analysis of various samples. .... | 13 |
|--------------------------------------------------------------------------------|----|

### 3. Supplementary Movies

|                                                                                                     |    |
|-----------------------------------------------------------------------------------------------------|----|
| <b>Movie S1</b> Micro-structure of the formaldehyde-free colorful sawdust-based particleboard. .... | 14 |
|-----------------------------------------------------------------------------------------------------|----|

|                         |    |
|-------------------------|----|
| <b>References</b> ..... | 15 |
|-------------------------|----|

## 1. Supplementary Figures

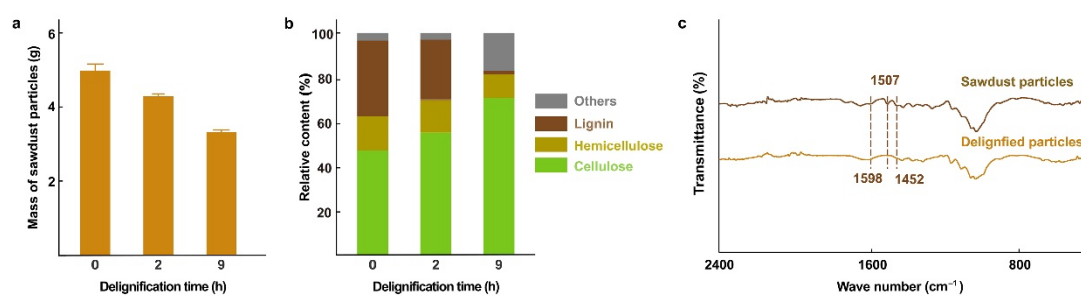

**Fig. S1** (a) Correlation between the mass of sawdust particles and delignification time, illustrating a gradual decrease in mass with increasing duration. (b) Chemical compositional analysis of the relative content of cellulose, hemicellulose, and lignin throughout the delignification process, showing a decrease in lignin content as the duration increases. (c) Fourier transform infrared (FTIR) spectra of natural and delignified sawdust particles showing the absence of lignin-specific infrared bands (aromatic skeletal vibrations) at 1,598, 1,507 and 1,452  $\text{cm}^{-1}$  in delignified samples.

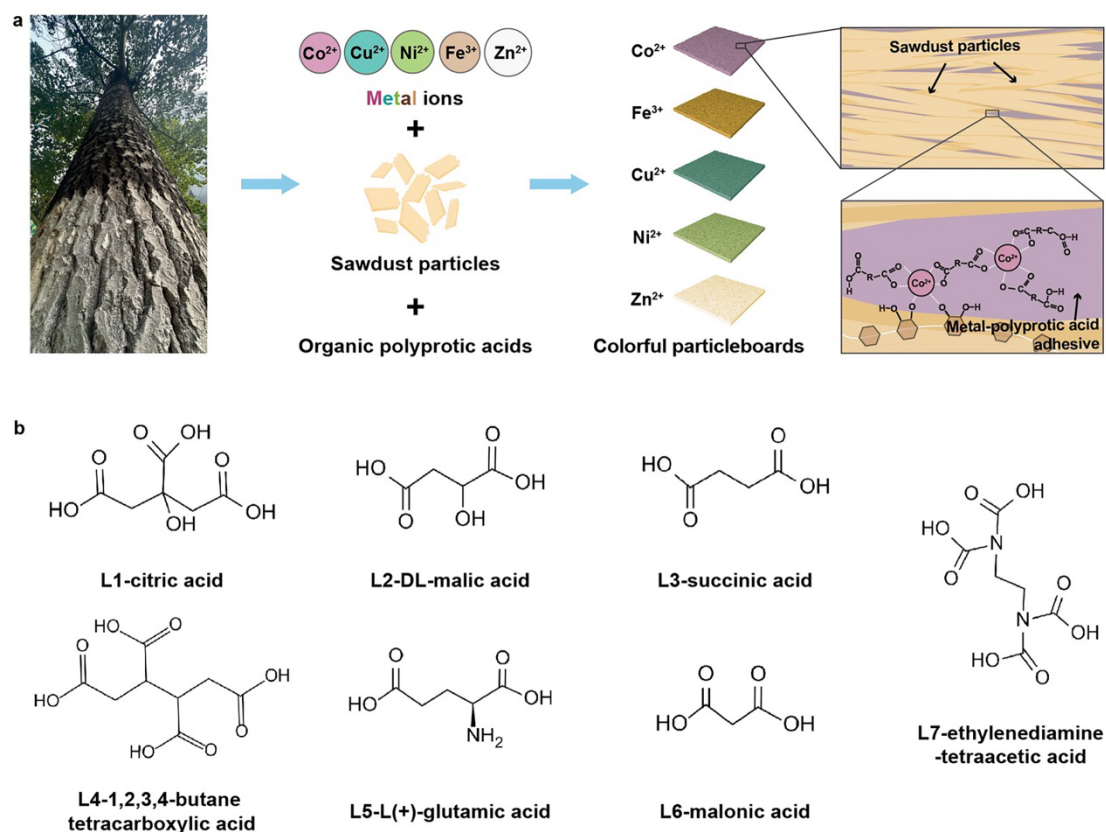

**Fig. S2** (a) Design of colorful particleboards utilizing organic polyprotic acids and metal ions as adhesives to bind delignified sawdust particles, followed by fabrication through hot-pressing. (b) Molecular structures of the polyprotic acids (L1 to L7) used in the as-prepared particleboards in Fig. 1.

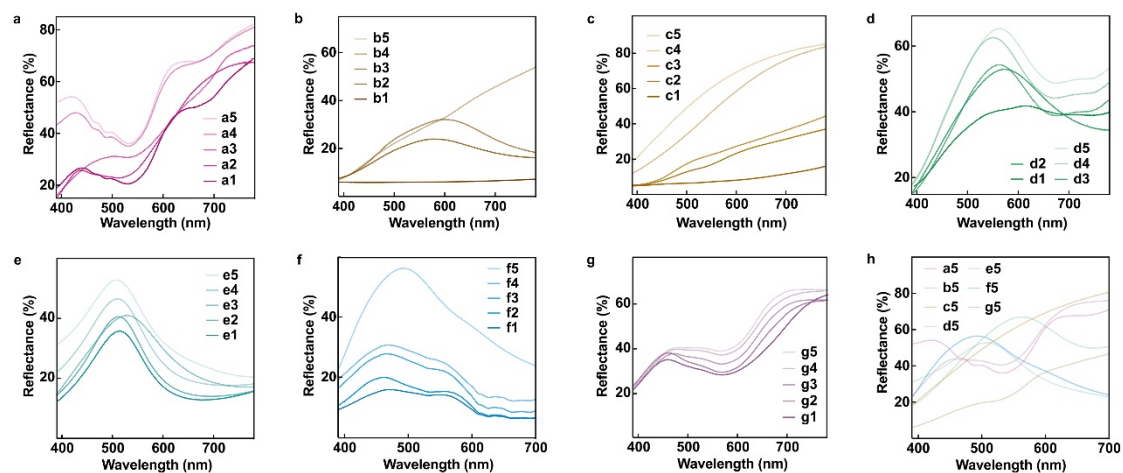

**Fig. S3** (a-h) UV-visible (UV-Vis) spectra of the as-prepared colorful particleboards in Fig. 1, with spectra a1 to g5 corresponding to the labels in Fig. 1.

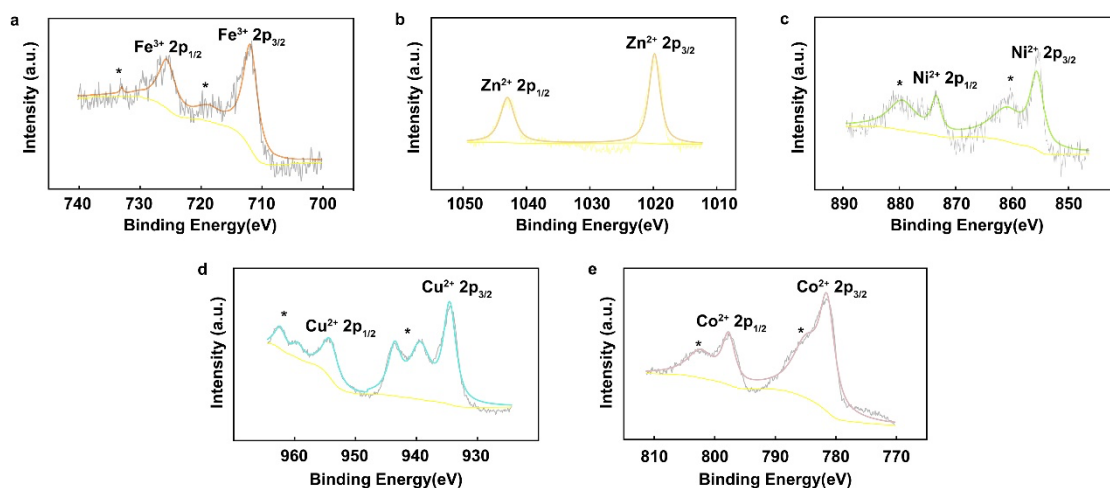

**Fig. S4** X-ray photoelectron spectroscopy (XPS)  $2p$  spectra of the as-prepared colorful particleboards in Fig. 2a, arranged from left to right. (a)  $\text{Fe}^{3+}$   $2p_{3/2}$  and  $2p_{1/2}$  peaks at 711.9 eV and 725.6 eV, respectively;<sup>1</sup> (b)  $\text{Zn}^{2+}$   $2p_{3/2}$  and  $2p_{1/2}$  peaks at 1022.8 eV and 1046.0 eV, respectively;<sup>2</sup> (c)  $\text{Ni}^{2+}$   $2p_{3/2}$  and  $2p_{1/2}$  peaks at 855.6 eV and 873.5 eV, respectively;<sup>3</sup> (d)  $\text{Cu}^{2+}$   $2p_{3/2}$  and  $2p_{1/2}$  peaks at 934.5 eV and 954.2 eV, respectively;<sup>4</sup> (e)  $\text{Co}^{2+}$   $2p_{3/2}$  and  $2p_{1/2}$  peaks at 781.3 eV and 797.7 eV,<sup>5</sup> respectively, along with their respective satellite peaks (marked with \*). a.u. arbitrary units.

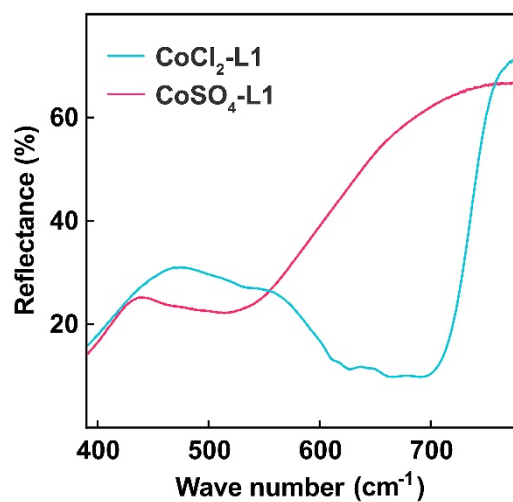

**Fig. S5** UV-vis spectra of the as-prepared particleboards, colored using CoCl<sub>2</sub> with L1 in tetra-coordinated configuration and CoSO<sub>4</sub> with L1 in six-coordinated configuration.

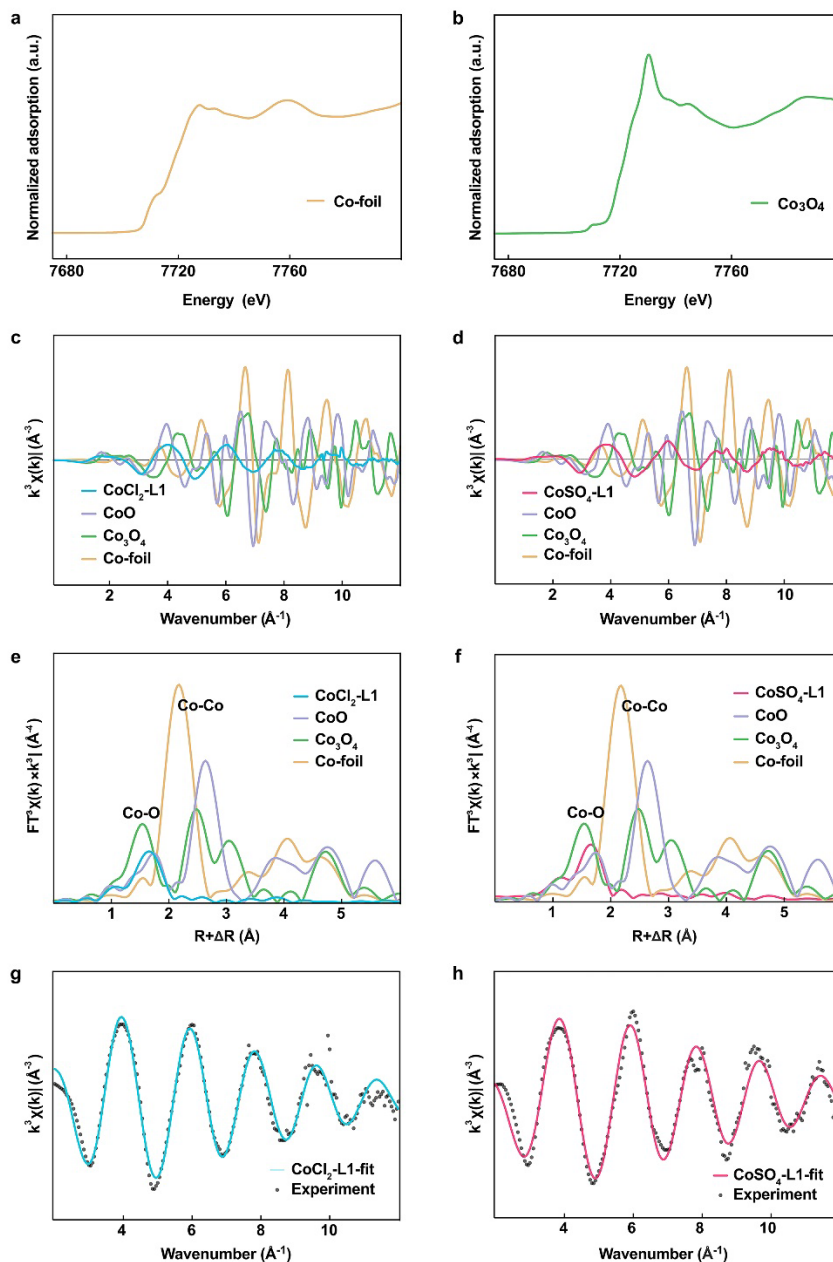

**Fig. S6** X-ray absorption analysis of coordination structures in as-prepared colorful particleboards. (a,b) Co K-edge X-ray absorption near-edge structure (XANES) spectra: (a) Co foil standard; (b)  $\text{Co}_3\text{O}_4$  standard samples. (c,d) K-edge  $k^3$ -weighted extended X-ray absorption fine structure (EXAFS) spectra of standard samples and the as-prepared colorful particleboards. (e,f) Fourier transformed (FT)  $k^3$ -weighted  $X(k)$ -function of the EXAFS spectra showing the coordination of Co-O in the as-prepared colorful particleboards. (g,h) K-edge  $k^3$ -weighted EXAFS spectra of the as-prepared colorful particleboards with corresponding fitting curves.



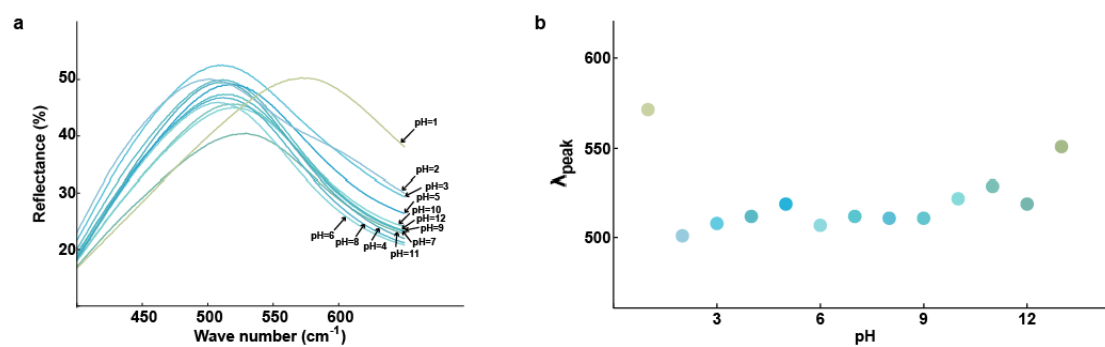

**Fig. S7** UV-vis spectra (a) and peaks value (b) of the as-prepared particleboards colored by  $\text{Cu}^{2+}$  and citric acid with different pH values of the adhesive aqueous solution.

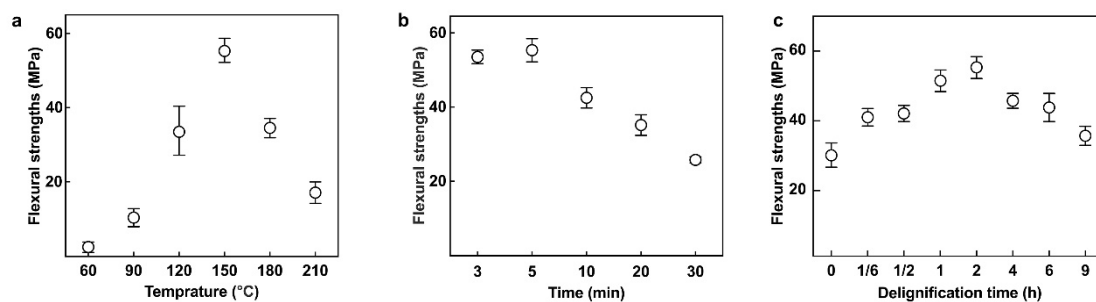

**Fig. S8** Regulation of the mechanical properties of the as-prepared particleboards. (a) Correlation between hot-pressing temperature and flexural strength, with the optimal temperature at 150 °C. (b) Correlation between hot-pressing duration and flexural strength, with the optimal pressing duration at 5 minutes. (c) Correlation between delignification time and flexural strength, with the optimal delignification time at 2 hours.

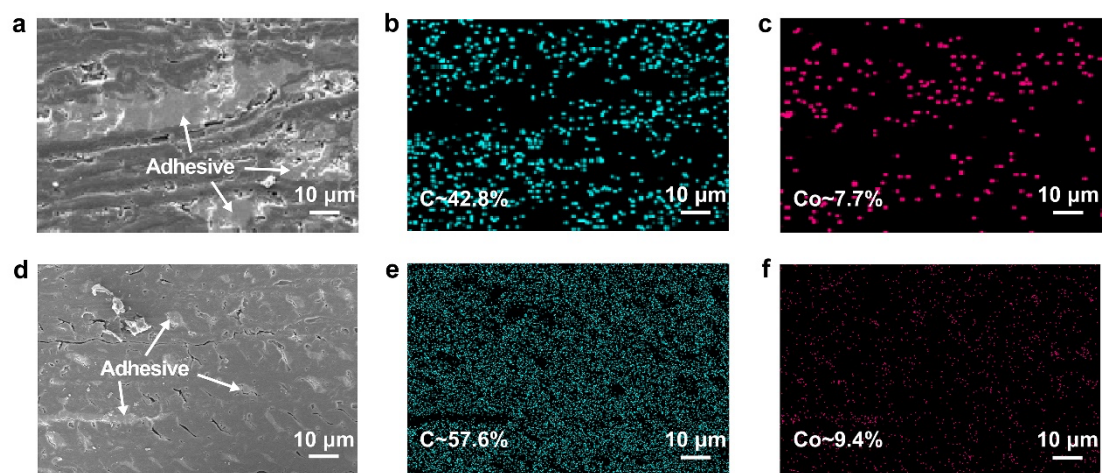

**Fig. S9** Microstructure of the as-prepared colorful particleboards. (a-f) Scanning electron microscopy images (a,d), carbon (c) mapping (b,d), and cobalt (Co) mapping (c,f) show the distribution of the adhesive between particles and inside particle lumina.

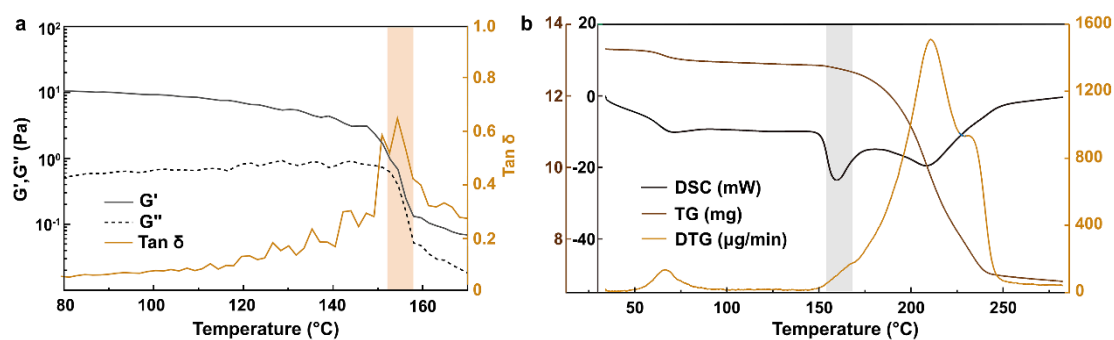

**Fig. S10** Heating-induced softening process of the adhesive. (a) Storage modulus ( $G'$ ), loss modulus ( $G''$ ), and loss factor ( $\tan \delta$ ) of the adhesive during the rheological frequency sweep test. The adhesive exhibited significant softening in the temperature range of 147-157 °C. (b) Differential scanning calorimetry (DSC) results for the adhesive, showing a melting peak between 150-170 °C.

## 2. Supplementary Tables

| Sample                | Scattering pair | CN        | BD(Å)         | $\sigma^2(\text{\AA}^2)$ | $\Delta E_0(\text{eV})$ | R factor |
|-----------------------|-----------------|-----------|---------------|--------------------------|-------------------------|----------|
| CoCl <sub>2</sub> -L1 | Co-O            | 4.3 ± 0.2 | 2.088 ± 0.006 | 0.0066 ± 0.0009          | 2.3 ± 0.6               | 0.0039   |
| CoSO <sub>4</sub> -L1 | Co-O            | 6.2 ± 0.6 | 2.069 ± 0.011 | 0.0061 ± 0.0015          | -2.0 ± 1.2              | 0.0105   |

**Table S1.** EXAFS coordinate environment analysis of various samples. CN: coordination number, BD: bonding distance,  $\sigma^2$ : mean-square disorder,  $\Delta E_0$ : energy shift, R factor: the goodness of the fit.

### **3. Supplementary Movies**

**Movie S1.** Micro-structure of the formaldehyde-free colorful sawdust-based particleboard.

## References

1. J. C. Langevoort, I. Sutherland, L. J. Hanekamp and P. J. Gellings, *Appl. Surf. Sci.*, 1987, **28**, 167-179.
2. B. R. Strohmeier, *Surf. Sci. Spectra*, 1994, **3**, 128-134.
3. A. N. Mansour and C. A. Melendres, *Surf. Sci. Spectra*, 1994, **3**, 247-254.
4. S. Vepřek, D. L. Cocke, S. Kehl and H. R. Oswald, *J. Catal.*, 1986, **100**, 250-263.
5. J. P. Bonnelle, J. Grimblot and A. D'Huysser, *J. Electron Spectrosc. Relat. Phenom.*, 1975, **7**, 151-162.
